# Supplementary material for: Metal–organic frameworks with 1,4-di(1H-imidazol-4-yl)benzene and varied carboxylate ligands for selectively sensing Fe(iii) ions and ketone molecules
Source: Royal Society of Chemistry journal article supplement (doi:10.1039/c7dt02981k), 2017-01-01
Supplement: c7dt02981k1.pdf [file c7dt02981k1.pdf]

## Electronic supplementary information (ESI)

### Metal-organic frameworks with 1,4-di(1H-imidazol-4-yl)benzene and varied carboxylate ligands for selectively sensing Fe(III) Ion and ketone molecules

Zhi-Qiang Liu,<sup>a</sup> Yue Zhao,<sup>a</sup> Xiu-Du Zhang,<sup>a</sup> Yan-Shang Kang,<sup>a</sup> Qing-Yi Lu,<sup>a</sup> Mohammad Azam,<sup>b</sup> Saud I Al-Resayes<sup>b</sup> and Wei-Yin Sun<sup>\*a</sup>

<sup>a</sup> Coordination Chemistry Institute, State Key Laboratory of Coordination Chemistry, School of Chemistry and Chemical Engineering, Nanjing National Laboratory of Microstructures, Collaborative Innovation Center of Advanced Microstructures, Nanjing University, Nanjing 210023, China

<sup>b</sup> Department of Chemistry, College of Science, King Saud University, P. O. Box 2455, Riyadh 11451, KSA

\* Corresponding author.

Email address: sunwy@nju.edu.cn (W. Y. Sun).

**Table S1.** Selected bond lengths (Å) and angles (°) for **1 - 4**.

| Compound <b>1</b>   |            |                   |           |
|---------------------|------------|-------------------|-----------|
| Zn(1)-N(1)          | 2.006(3)   | Zn(1)-O(2)        | 2.444(3)  |
| Zn(1)-O(1)          | 2.048(3)   |                   |           |
| N(1)-Zn(1)-N(1)#1   | 109.7(2)   | N(1)#1-Zn(1)-O(2) | 90.79(13) |
| N(1)-Zn(1)-O(1)#1   | 104.30(13) | O(1)#1-Zn(1)-O(2) | 89.40(11) |
| N(1)#1-Zn(1)-O(1)#1 | 98.66(12)  | O(1)-Zn(1)-O(2)   | 57.91(10) |
| O(1)#1-Zn(1)-O(1)   | 139.62(16) | O(2)-Zn(1)-O(2)#1 | 76.61(15) |
| N(1)-Zn(1)-O(2)     | 152.86(12) |                   |           |

Symmetry transformations used to generate equivalent atoms: #1 x, -y+1/2, -z+1/2.

---

**Compound 2**

|                   |            |                     |            |
|-------------------|------------|---------------------|------------|
| Co(1)-N(3)        | 2.0389(15) | Co(1)-O(3)#1        | 2.0812(13) |
| Co(1)-N(1)        | 2.0633(15) | Co(1)-O(2)          | 2.3351(14) |
| Co(1)-O(1)        | 2.0784(14) | Co(1)-O(4)#1        | 2.3513(16) |
| N(3)-Co(1)-N(1)   | 102.84(7)  | O(1)-Co(1)-O(2)     | 58.60(5)   |
| N(3)-Co(1)-O(1)   | 138.17(6)  | O(3)#1-Co(1)-O(2)   | 169.10(5)  |
| N(1)-Co(1)-O(1)   | 99.78(6)   | N(3)-Co(1)-O(4)#1   | 92.55(6)   |
| N(3)-Co(1)-O(3)#1 | 102.37(6)  | N(1)-Co(1)-O(4)#1   | 151.23(6)  |
| N(1)-Co(1)-O(3)#1 | 94.13(6)   | O(1)-Co(1)-O(4)#1   | 83.73(6)   |
| O(1)-Co(1)-O(3)#1 | 110.61(5)  | O(3)#1-Co(1)-O(4)#1 | 58.51(5)   |
| N(3)-Co(1)-O(2)   | 86.75(6)   | O(2)-Co(1)-O(4)#1   | 115.77(5)  |
| N(1)-Co(1)-O(2)   | 89.56(6)   |                     |            |

Symmetry transformations used to generate equivalent atoms:

#1 x+1, y, z+1.

---

**Compound 3**

|                    |            |                  |            |
|--------------------|------------|------------------|------------|
| Ni(1)-N(3)         | 2.044(2)   | Ni(2)-O(9)       | 2.059(2)   |
| Ni(1)-O(3)         | 2.0644(17) | Ni(2)-O(1)       | 2.0643(19) |
| Ni(1)-O(10)        | 2.122(2)   | Ni(2)-O(12)      | 2.100(2)   |
| Ni(2)-O(8)         | 2.032(2)   | Ni(2)-O(7)       | 2.114(2)   |
| Ni(2)-N(1)         | 2.045(2)   |                  |            |
| O(12)-Ni(2)-O(7)   | 87.46(9)   | O(8)-Ni(2)-O(1)  | 89.03(8)   |
| N(3)-Ni(1)-O(3)    | 90.25(7)   | N(1)-Ni(2)-O(1)  | 176.79(8)  |
| N(3)#1-Ni(1)-O(3)  | 89.75(7)   | O(9)-Ni(2)-O(1)  | 92.33(8)   |
| N(1)-Ni(2)-O(9)    | 87.66(8)   | O(8)-Ni(2)-O(12) | 171.36(8)  |
| N(3)-Ni(1)-O(10)   | 87.97(8)   | N(1)-Ni(2)-O(12) | 90.63(8)   |
| N(3)#1-Ni(1)-O(10) | 92.03(8)   | O(9)-Ni(2)-O(12) | 94.38(9)   |
| O(3)-Ni(1)-O(10)   | 90.66(8)   | O(1)-Ni(2)-O(12) | 86.17(8)   |
| O(3)#1-Ni(1)-O(10) | 89.34(8)   | O(8)-Ni(2)-O(7)  | 85.24(9)   |
| O(1)-Ni(2)-O(7)    | 88.44(8)   | N(1)-Ni(2)-O(7)  | 91.67(9)   |
| O(8)-Ni(2)-N(1)    | 94.18(8)   | O(9)-Ni(2)-O(7)  | 178.05(8)  |
| O(8)-Ni(2)-O(9)    | 92.98(8)   |                  |            |

Symmetry transformations used to generate equivalent atoms:

#1 -x+2, -y, -z+1.

---

| Compound 4        |            |                     |            |
|-------------------|------------|---------------------|------------|
| Cd(1)-N(1)        | 2.208(5)   | Cd(1)-O(4)#2        | 2.266(4)   |
| Cd(1)-O(1)        | 2.207(4)   | Cd(1)-O(6)#3        | 2.507(4)   |
| Cd(1)-O(3)#1      | 2.219(4)   |                     |            |
| N(1)-Cd(1)-O(1)   | 145.95(16) | O(3)#1-Cd(1)-O(4)#2 | 110.48(15) |
| N(1)-Cd(1)-O(3)#1 | 111.55(17) | N(1)-Cd(1)-O(6)#3   | 81.27(15)  |
| O(1)-Cd(1)-O(3)#1 | 95.32(15)  | O(1)-Cd(1)-O(6)#3   | 79.65(13)  |
| N(1)-Cd(1)-O(4)#2 | 84.78(16)  | O(3)#1-Cd(1)-O(6)#3 | 86.95(14)  |
| O(1)-Cd(1)-O(4)#2 | 105.62(15) | O(4)#2-Cd(1)-O(6)#3 | 160.85(16) |

Symmetry transformations used to generate equivalent atoms:  
#1 -x, -y+2, -z+1; #2 x+1, y, z; #3 x+1, y, z-1.

**Table S2.** The parameters of hydrogen bonds for **2** and **3**.

| Complex 2             |            |              |              |                |
|-----------------------|------------|--------------|--------------|----------------|
| <i>D-H...A</i>        | <i>D-H</i> | <i>H...A</i> | <i>D...A</i> | <i>D-H...A</i> |
| O(1W)-H(1WB)...O(1)   | 0.85       | 2.57         | 3.094(3)     | 121            |
| O(1W)-H(1WA)...O(4)#1 | 0.85       | 2.23         | 3.018(3)     | 154            |
| N(4)-H(4)...O(2)#5    | 0.86       | 1.93         | 2.775(2)     | 167            |
| N(2)-H(2A)...O(3)#6   | 0.86       | 1.98         | 2.785(2)     | 155            |

Symmetry codes: #1 -x, -y-1, -z+2; #5 x+1, y+1, z; #6 -x+1, -y+1, -z+1.

| Complex 3              |            |              |              |                |
|------------------------|------------|--------------|--------------|----------------|
| <i>D-H...A</i>         | <i>D-H</i> | <i>H...A</i> | <i>D...A</i> | <i>D-H...A</i> |
| O(12)-H(12B)...O(11)#6 | 0.88       | 1.88         | 2.744(4)     | 169            |
| O(11)-H(11C)...O(2)#7  | 0.85       | 1.91         | 2.735(4)     | 163            |
| O(10)-H(10A)...O(4)#8  | 0.86       | 2.18         | 2.908(3)     | 143            |
| O(10)-H(10B)...O(4)#1  | 0.82       | 2.00         | 2.733(3)     | 149            |
| O(9)-H(9B)...O(5)#9    | 0.89       | 1.94         | 2.830(3)     | 175            |
| O(9)-H(9A)...O(2)      | 0.82       | 1.84         | 2.582(3)     | 150            |
| O(8)-H(8B)...O(6)#8    | 0.74       | 2.13         | 2.807(3)     | 153            |
| O(8)-H(8A)...O(6)#9    | 0.82       | 1.85         | 2.608(3)     | 153            |
| O(7)-H(7A)...O(5)#10   | 0.84       | 2.04         | 2.874(3)     | 173            |
| N(4)-H(4)...O(5)#11    | 0.86       | 2.18         | 3.014(3)     | 162            |
| N(2)-H(2)...O(4)#6     | 0.86       | 2.08         | 2.872(3)     | 152            |

Symmetry codes: #1  $-x+2, -y, -z+1$ ; #4  $-x+1, -y, -z+2$ ; #5  $-x+2, -y, -z+2$ ; #6  $x, y, z+1$ ; #7  $x+1, y, z-1$ ; #8  $x+1, y, z$ ; #9  $-x, -y+1, -z+2$ ; #10  $-x+1, -y+1, -z+2$ ; #11  $x+1, y-1, z$ .

---

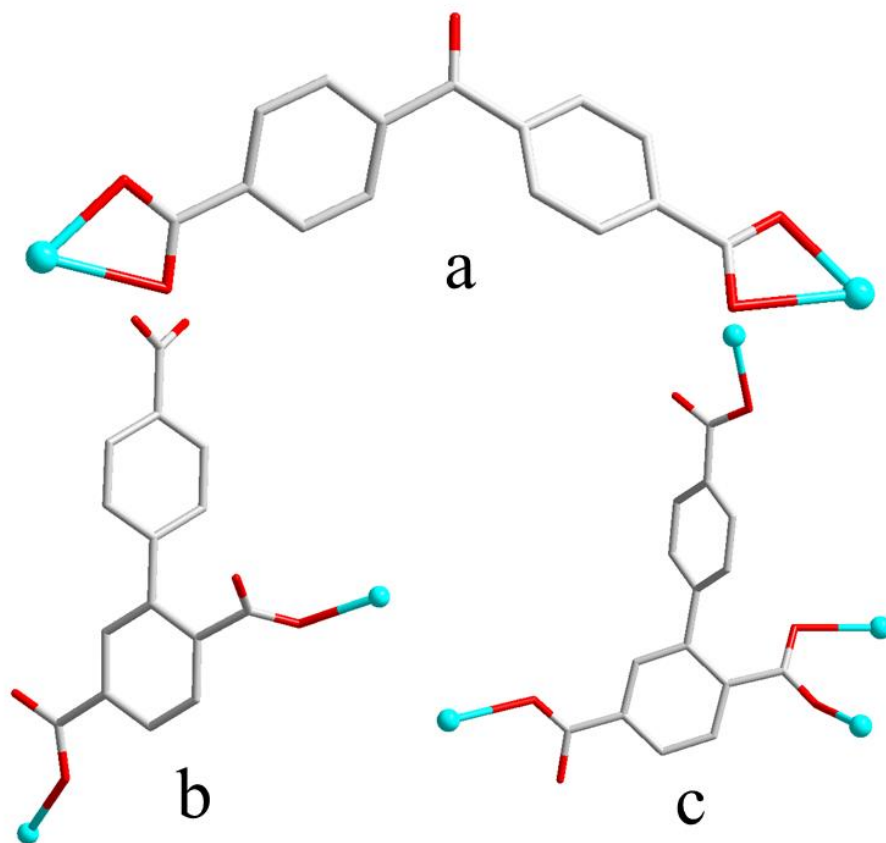

**Scheme S1.** Coordination modes of carboxylate ligands appeared in **1 - 4**.

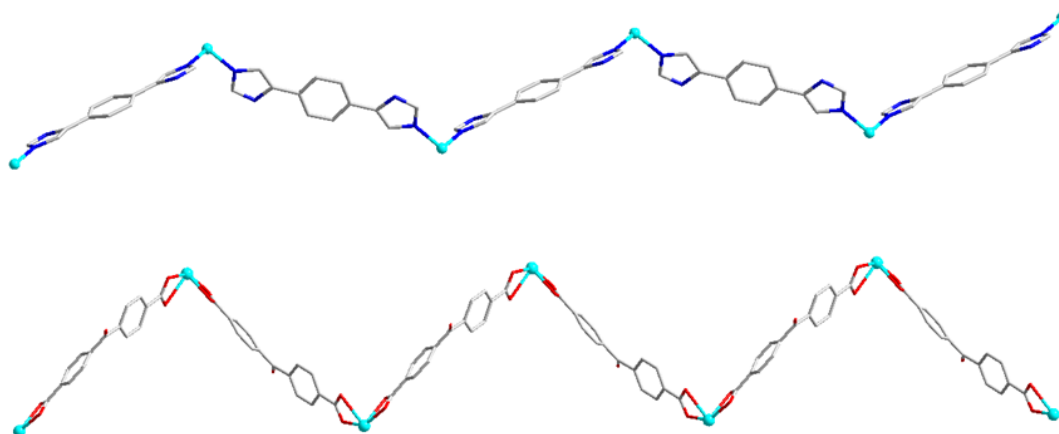

**Fig. S1.** The 1D zigzag chains of Zn(II)-L and Zn(II)-bpdC<sup>2-</sup> in **1**.

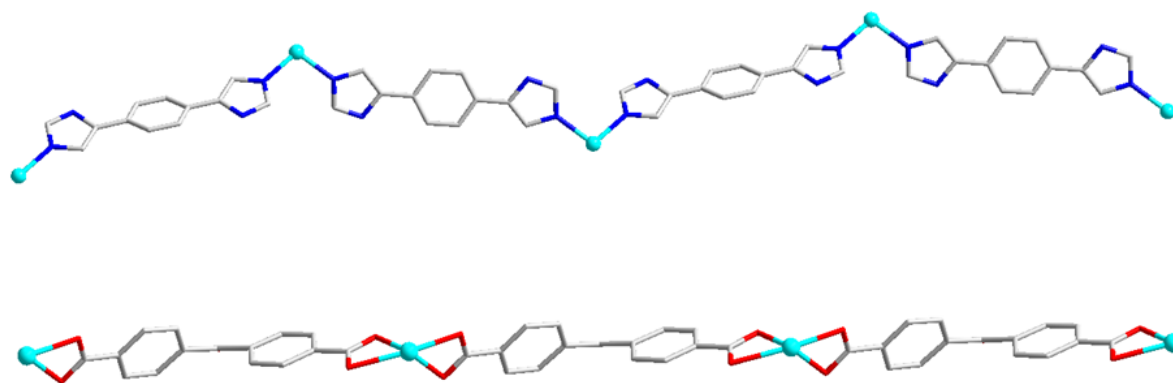

**Fig. S2.** 1D zigzag chains of Co(II)-L and Co(II)-bpdC<sup>2-</sup> in **2**.

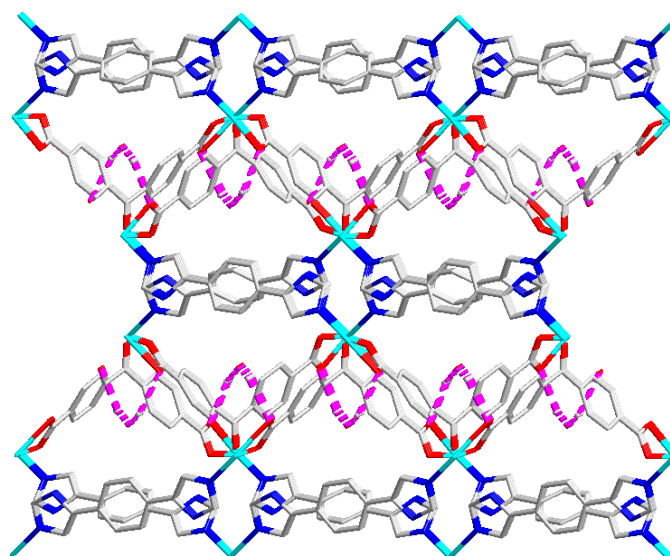

**Fig. S3.** 3D structure of **2** with hydrogen bonds indicated by dashed lines.

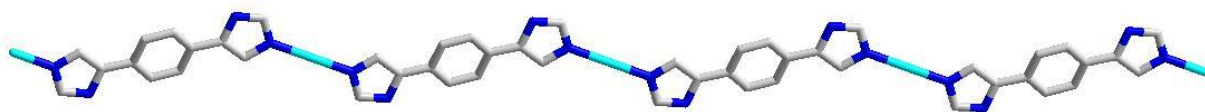

**Fig. S4.** 1D zigzag chain of Ni(II)-L in **3**.

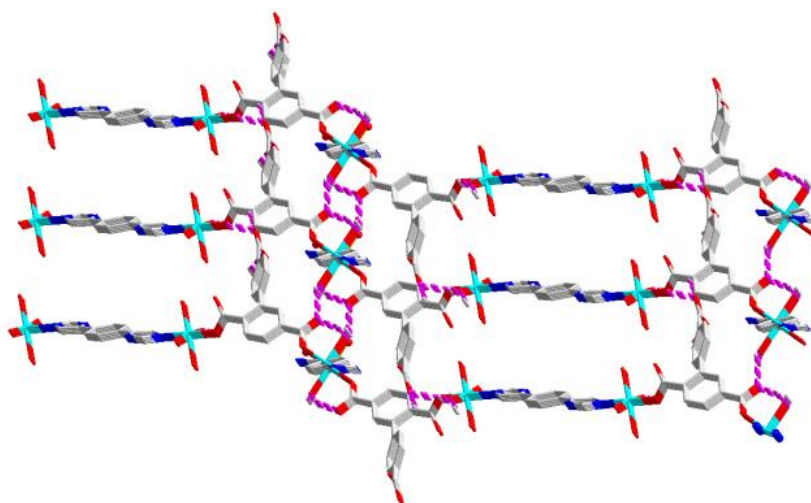

**Fig. S5.** 3D structure of **3** with hydrogen bonds indicated by dashed lines.

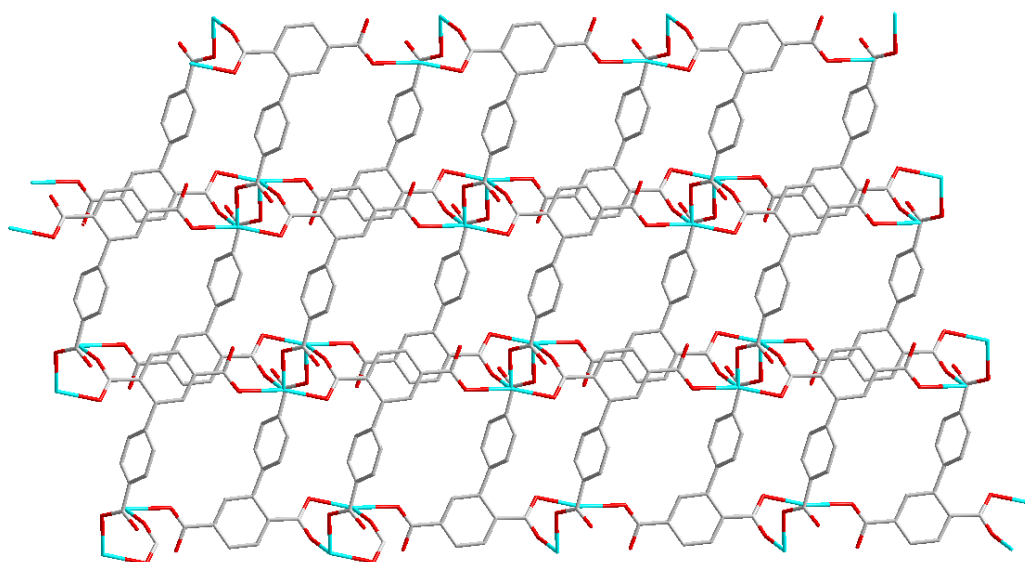

**Fig. S6.** The 2D network of Cd(II)-Hbptc<sup>2-</sup> in **4**.

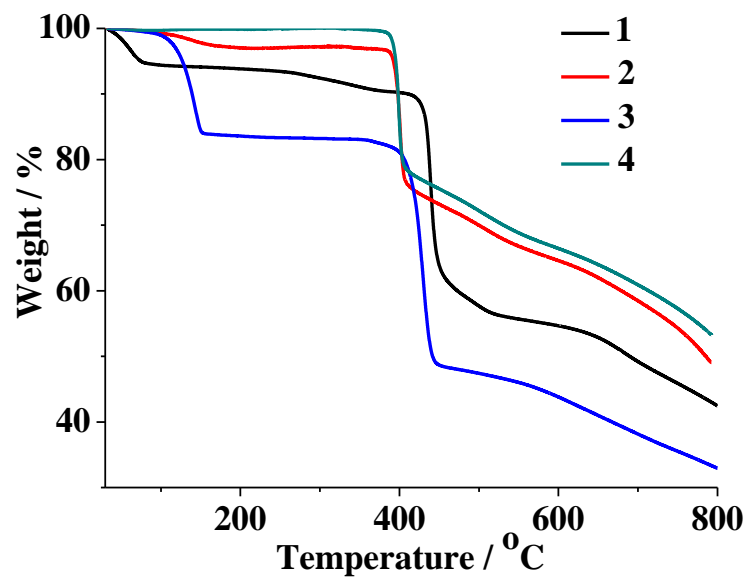

**Fig. S7.** TG curves of **1 - 4**.

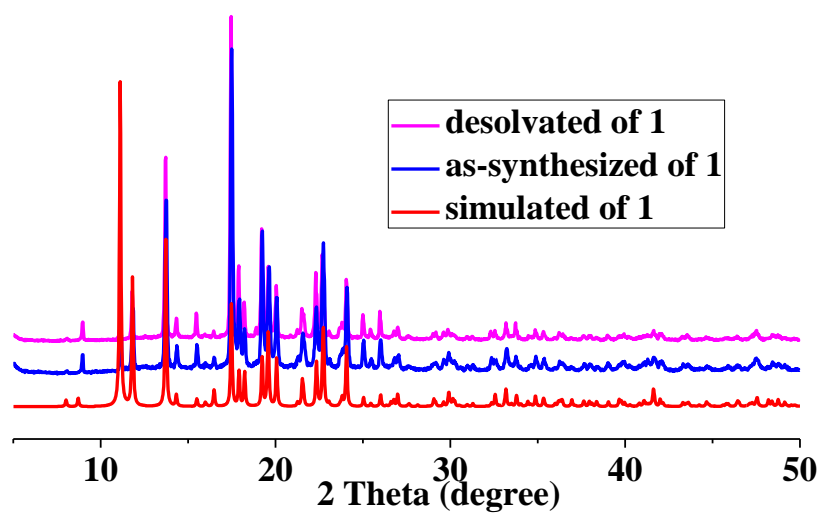

(a)

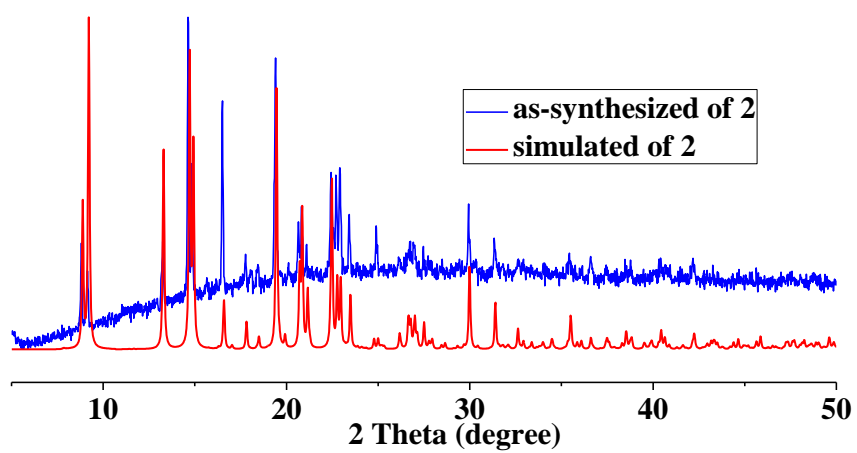

(b)



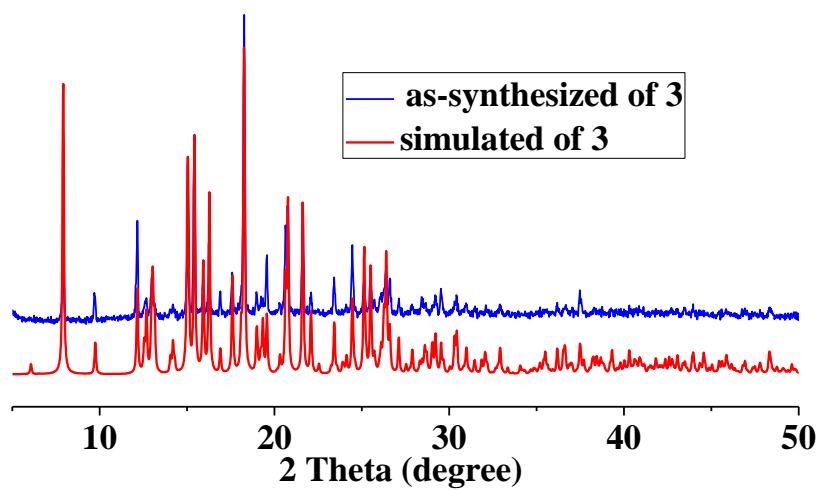

(c)

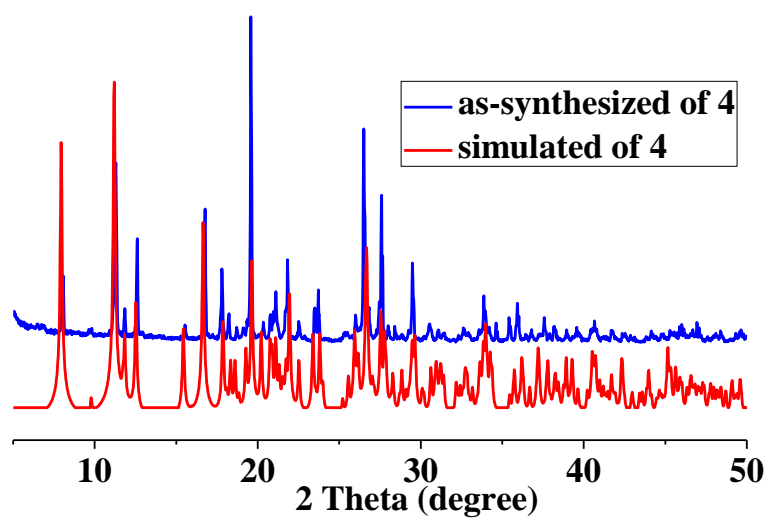

(d)

**Fig. S8.** PXRD patterns of **1 - 4**.

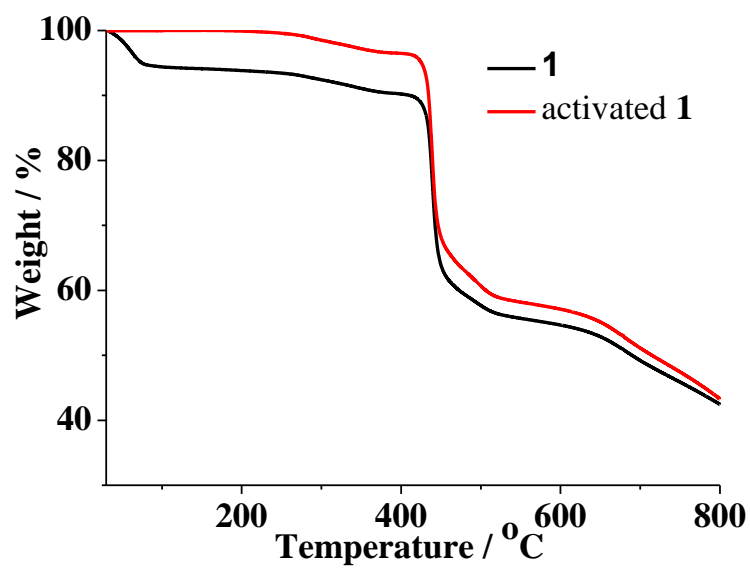

**Fig. S9.** TG curves of **1**.

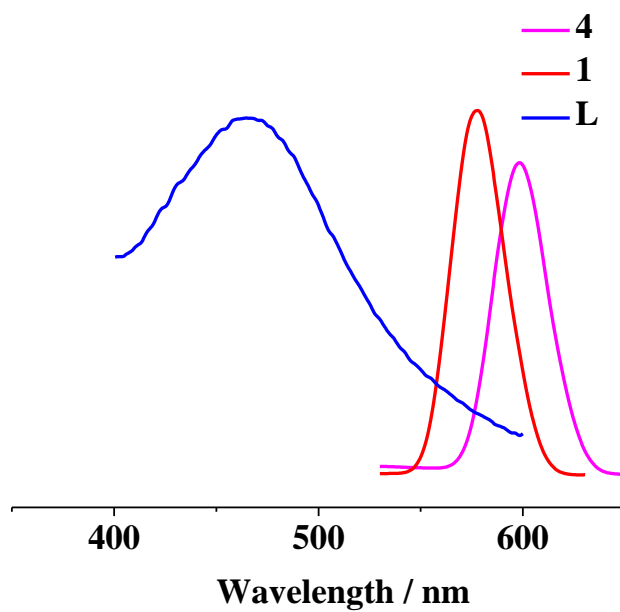

**Fig. S10.** Emission spectra of **1**, **4** and ligand **L** in the solid state.

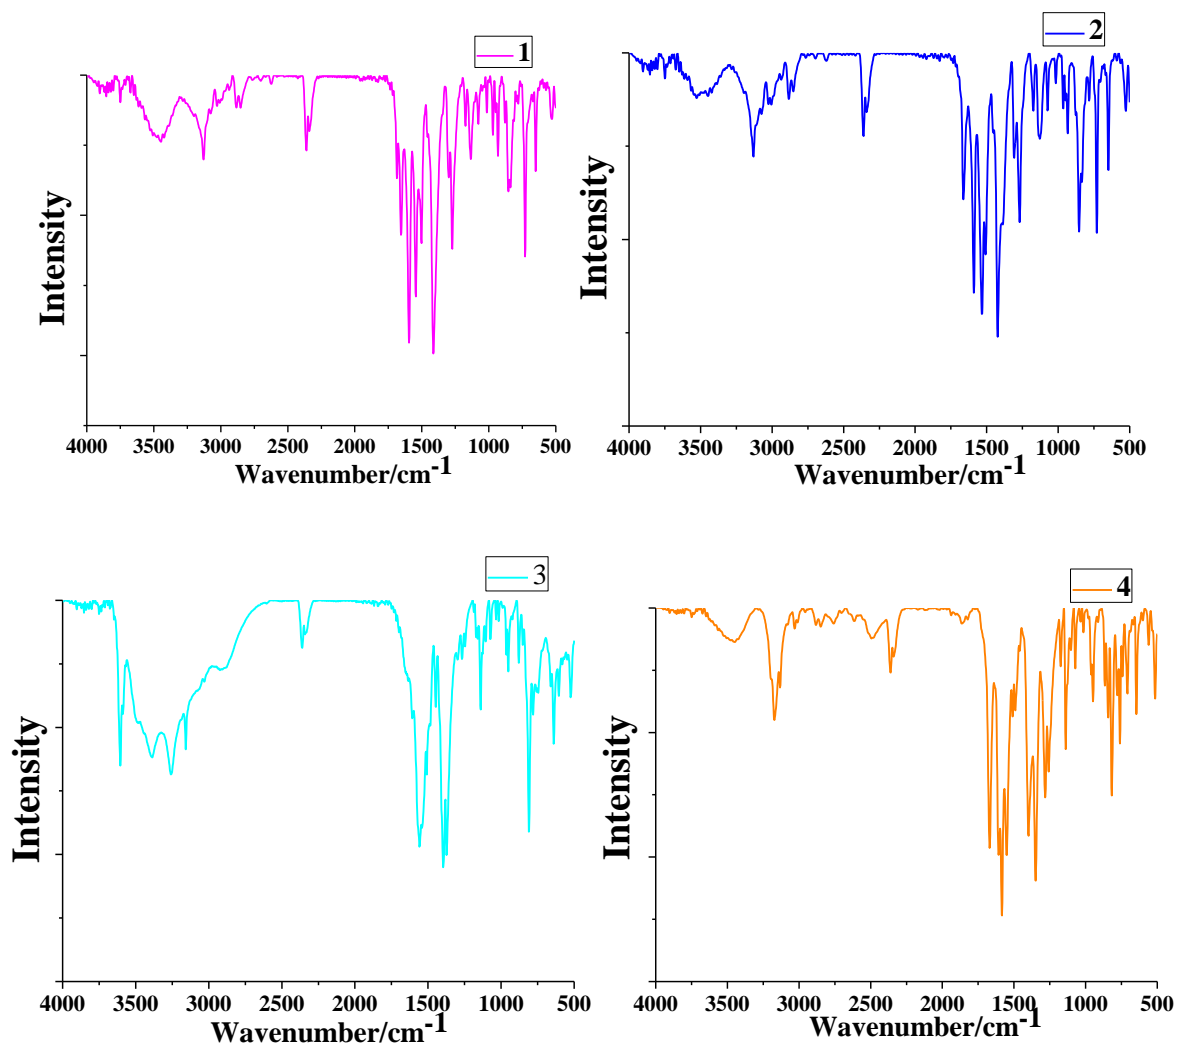

Fig. S11. IR spectra of 1 - 4.
